# Supplementary material
Source: MDPI journal article supplement (https://www.mdpi.com/2813-0413/1/1/7)
Supplement: s1 [file s1]

Supplementary Materials

**Table S1.** Shows the characteristic of healthy controls. Seven healthy volunteers matched for sex and age (range age 36–61 years) were used as control group.

| Table S1. Healthy controls |     |     |
|----------------------------|-----|-----|
| Subject                    | Sex | Age |
| 1                          | m   | 61  |
| 2                          | m   | 54  |
| 3                          | m   | 36  |
| 4                          | m   | 47  |
| 5                          | m   | 42  |
| 6                          | m   | 53  |
| 7                          | m   | 40  |

**Table S2.** Shows further nomenclature detail, the mature miRNA sequence and the number of specific TaqMan Assay ID.

| Table S2. TaqMan microRNA primer sequences |                                                                                                                  |                   |
|--------------------------------------------|------------------------------------------------------------------------------------------------------------------|-------------------|
| MiRNA                                      | Mature miRNA                                                                                                     | sequence Assay ID |
| hsa-miR-206                                | UGGAAUGUAAGGAAGUGUGUGG                                                                                           | 000510            |
| cel-miR-39-3p                              | UCACCGGGUGUAAAUCAGCUUG                                                                                           | 000200            |
| hsa-miR-16                                 | UAGCAGCACGUAAAUAUUGGCG                                                                                           | 000391            |
| U6 snRNA                                   | GTGCTCGCTTCGGCAGCACATATACTAAAATTGGAACGATACAGA-GAAGATTA<br>GCATGGCCCCTGCGCAAGGATGACACGCAAATTCGTGAA-GCGTTCCATATTTT | 001973            |
